## Temperature-dependent benefits of bacterial exposure in embryonic development of *Daphnia magna* resting eggs

Alexandra A. Mushegian, Elodie Burcklen, Tobias M. M. Schär, Dieter Ebert  
Zoological Institute, Universität Basel, Basel, Switzerland

### **Summary Statement**

Presence of bacteria increases successful embryonic development of *Daphnia magna* resting eggs at an elevated temperature.

### **Abstract**

The environments in which animals develop and evolve are profoundly shaped by bacteria, which affect animals both indirectly through their roles in biogeochemical processes and also through direct antagonistic or beneficial interactions. The outcomes of these activities can differ according to environmental context. In a series of laboratory experiments with diapausing eggs of the water flea *Daphnia magna*, we manipulated two environmental parameters, temperature and presence of bacteria, and examined their effect on development. At elevated temperatures ( $\geq 26$  °C), resting eggs developing without live bacteria had reduced hatching success and correspondingly higher rates of severe morphological abnormalities compared to eggs with bacteria in their environment. The beneficial effect of bacteria was strongly reduced at 20 °C. Neither temperature nor presence of bacteria affected directly developing parthenogenetic eggs. The mechanistic basis of this effect of bacteria on development is unclear, but these results highlight the complex interplay of biotic and abiotic factors influencing animal development after diapause.

## ***Introduction***

All animals evolved in an environment with an omnipresence of bacteria. Bacteria affect animals' environments from global scales (e.g. driving elemental cycles and ecosystem productivity (Howard et al. 2006; van der Heijden et al. 2008)) to extremely local (e.g. degrading polysaccharides in the gut (Martens et al. 2011)). Accordingly, animal evolution has widely featured adaptations to ecosystems shaped by bacteria (McFall-Ngai et al. 2013), as well as interactions with bacteria that affect animals' responses to other environmental factors. Bacteria can protect animals and their embryonic stages from pathogens (Gil-Turnes et al. 1989), heavy metal pollution (Senderovich & Halpern 2013; Breton et al. 2013), or toxic secondary compounds in plant diets (Kohl et al. 2014); conversely, they can convert xenobiotics into more harmful forms (Freeland & Janzen 1974; Zheng et al. 2013). Bacteria can provide crucial signals about the environment, as in the case of marine tubeworm larvae that use molecules from surface-associated bacteria as cues to settle and metamorphose (Shikuma et al. 2014). Presence of bacteria is an environmental factor that induces aspects of the development of the vertebrate gut epithelium (Bates et al. 2006) and immune system (Ivanov et al. 2009), influencing fat storage (Semova et al. 2012) and systemic inflammatory response (Galindo-Villegas et al. 2012). The role of bacteria in normal animal development has been further demonstrated in mosquitoes, which failed to develop past the first larval instar without bacteria (Coon et al. 2014), and in *Drosophila*, which failed to develop under nutrient-poor conditions without bacteria (Shin et al. 2011). The specificity, evolutionary history, and underlying mechanistic causes of these types of interactions vary widely (Douglas 2014).

Under changing environmental conditions, the effects of positive interspecies interactions can become dampened or more pronounced. If one or both species are stressed, the effect of each individual interaction might be altered, if the ability of one or both species to perform their functions is affected or if a particular function becomes more important for fitness (Xie et al. 2013; Kiers et al. 2010; Márquez et al. 2007). Furthermore, stressful conditions can reveal cryptic phenotypic variation among individuals, meaning the variation and net effect of the interaction on the population level might be altered. The stresses caused by increasing global temperatures are predicted to affect many insect-symbiont interactions (Wernegreen 2012), change the

phenology of plant/herbivore or plant/pollinator interactions (Musolin et al. 2010), and generally affect the microbial ecology of aquatic environments.

The water flea *Daphnia*, a planktonic microcrustacean, is a model for studies of organismal responses to ecological challenges in both basic and applied research settings (Colbourne et al. 2011). Found in a geographically and ecologically wide range of environments, from the tropics to arctic regions, *Daphnia* species exhibit great phenotypic diversity and have been used to test numerous theories in evolutionary ecology (EBERT 2011; Altermatt & Ebert 2008; Lynch & Ennis 1983). In addition to being used as an environmental quality monitor under contemporary conditions, *Daphnia* also serves as a record of historical adaptation to changing environments through dormant stages archived in sediments, which can be “resurrected” and compared to modern phenotypes (Frisch et al. 2014). These resting stages, encased in chambers called ephippia, are produced by *Daphnia* in the sexual phase of its reproductive cycle, typically in response to conditions indicating environmental deterioration or the end of a season (e.g. crowding or changes in photoperiod). Development of the resting stage arrests at the onset of gastrulation, in an approximately 1000-cell stage (Baldass 1941) with the embryo contained in a protective, inflexible tertiary egg membrane in addition to the two membranes found around directly developing parthenogenetic eggs (Navis et al. 2015). These ephippial embryos can then persist for periods of days to decades and be dispersed to new habitats, surviving drying, temperature extremes, anoxia and chemical exposure. For simplicity, we refer to the diapausing, tertiary-membrane-bound embryos as “eggs” and use “embryo” to refer to all post-diapause developmental stages until the animal reaches a freely swimming state. (Throughout this paper we use eggs that have been removed from ephippial shells in order to standardize their treatment; we emphasize this to avoid confusion arising from the fact that some literature uses “resting egg” to refer collectively to the entire ephippium and the embryos inside it.) The cues and environmental conditions allowing emergence from diapause are relatively poorly understood (Smirnov 2014; Vanvlasselaer & De Meester 2010), but the “seed bank” of resting eggs of *Daphnia* and other invertebrates is recognized as an important component of ecosystem dynamics (Hairston 1996). Resting stages may spend considerable lengths of time in varying degrees of contact with bacteria-rich sediments, and bacteria have been detected on the inside surfaces of ephippial shells (Schultz

1977). The roles of bacteria at all stages of the *Daphnia* life cycle are therefore of interest for understanding determinants of phenotype and fitness and subsequent effects on the ecosystem.

We previously found that *Daphnia magna* raised in sterile environments after emerging from surface-sterilized eggs grow more slowly, reproduce less, and die sooner than animals subjected to identical treatment but colonized with bacteria (“conventionalized” by exposure to bacteria from homogenized adult *Daphnia* during development) (Sison-Mangus et al. 2014). In the course of developing our protocols for germ-free and conventionalized animals, we serendipitously observed that under some conditions, a beneficial effect of bacteria on fitness could be observed even earlier, during embryonic development of resting eggs. In a series of experiments manipulating temperature and bacterial environment of surface-sterilized eggs in fully factorial setups, we confirmed that at temperatures of 26–28 °C, in the absence of live bacteria, embryonic development failed at higher rates than when bacteria were present in the hatching medium.

## **Methods**

### Comparing hatching rates

Except where noted, diapausing eggs used in these experiments were collected in a carp pond near Munich, Germany (site code DE-K2-2; coordinates = N 48.2046028°, E 011.6793556°). Ehippia were collected at this site in 2009 and have since been kept in moist conditions in the dark at 4 °C. Eggs were manually removed from ehippia under a dissecting microscope using forceps and transferred to tissue culture plates containing artificial *Daphnia* medium (ADaM) (recipe at <http://evolution.unibas.ch/ebert/lab/adam.htm>). Collected eggs were stored in the dark at 4 °C overnight until experiment was set up the following day.

To manipulate temperature, we constructed a cooling device to hold six 96-well flat-bottomed tissue culture plates (Falcon, Becton Dickinson Labware, Franklin Lakes, NJ, USA) under an overhead light with a cooling element under one half of each plate. The temperature in the cool half was adjusted to 20 °C (hereafter referred to as “standard” temperature) while the temperature in the uncooled half, warmed by the lamp, ranged from 26 to 28 °C (hereafter referred to as “warm” temperature).

All eggs were surface-sterilized in one batch with household bleach ( $\leq 5\%$  sodium hypochlorite) for 5 minutes in an Eppendorf tube, which was inverted continuously to expose all sides of eggs. Bleach was removed and eggs were washed by adding and removing sterile (autoclaved) ADaM or water 3 times. Eggs were transferred into a wide, shallow dish of sterile ADaM and haphazardly placed in individual wells of 96-well tissue culture plates containing 180  $\mu\text{l}$  sterile ADaM. No eggs were placed in the wells immediately alongside the temperature boundary at the center of the plate.

Alternating rows of wells were assigned to be sterile (STE) or conventionalized (CONV) (randomizing the assignment of the first row), with equal numbers of STE and CONV rows in each plate. To the CONV rows, 20  $\mu\text{l}$  *Daphnia* homogenate (consisting of 10 intermediate-sized adult *Daphnia* freshly homogenized in 1.5 ml ADaM) was added. To the STE, 20  $\mu\text{l}$  sterile ADaM was added. These procedures were carried out under a sterile laminar flow hood. Plates were covered and inspected with an inverted light microscope; any eggs that were visibly mechanically damaged were excluded from further analysis. Plates were then placed on the cooling device, randomizing which half of the plate was cooled.

Substantial numbers of free-swimming hatchlings were observed in the warm treatment 3 days after the experiment was set up, and in the cool treatment 1 day later, consistent with previous observations of temperature effects on development time. We checked for hatchlings daily and report the proportion of free-swimming hatchlings in each treatment combination on the fifth day after the experiment was set up, when emergence of new hatchlings in both temperature conditions had slowed or stopped. Development was analyzed as a binary variable, “success” or “failure,” with “success” defined as a neonate freely swimming in the well. The “failure” category consisted of multiple outcomes, mainly divisible into i) eggs that show no signs of development visible with light microscopy and ii) hatchlings or embryos exhibiting severe, obvious morphological abnormalities preventing them from swimming normally, such as misshapen carapaces and eyes, stunted or missing appendages or setae, or prematurely broken membranes. The failure category also included any developing embryos that had not reached a free-swimming state by the end of the experiment but did not have any obvious abnormalities, which always comprised less than 1-3% of the totals at the time points in the experiments when outcomes were reported. We used swimming vs. non-swimming as our criterion in order to be conservative in our categorization, as it

was not possible for the observer to be blinded to the treatment since bacteria or *Daphnia* homogenate were sometimes visible in the wells under the microscope. Except where differences are noted, these assay procedures were repeated in all following experiments.

To test if the observed effect was specific to the Munich population, a similar experiment was carried out using ephippia collected from a rock pool in Finland. These eggs were conventionalized with a homogenate of animals originating from this population.

### Effects of individual bacteria

To confirm that the observed effects in the bacterial treatment were due to bacteria, and not to some other component of the homogenized *Daphnia* body, we conducted an experiment using pure cultures of bacterial strains isolated from apparently healthy field-collected *Daphnia* or laboratory-grown algal food. Five strains – *Pseudomonas sp*, *Burkholderiales sp*, *Aeromonas sp*, *Brevundimonas sp* (from *Daphnia*) and *Variovorax sp* (from algae) – were arbitrarily selected from the laboratory stock collection and their effect on hatching was contrasted with germ-free conditions at 22-23 (due to technical problems with the cooling device) and 27 °C. These strains were grown for 3 days in liquid LB medium (Sigma-Aldrich) at 37 °C with shaking, without regard to the growth phase each culture would reach during this time. Culture medium was removed by decanting after centrifugation, and bacteria were resuspended in sterile ADaM and diluted in ADaM to roughly the same final OD600 (calculated to be ~0.017-0.019, except for *Burkholderiales*, the concentration of which was ~0.001 because the culture did not grow to sufficient density). Another treatment consisted of a mixture of these strains. A treatment using whole-*Daphnia* homogenate as the bacterial source was also included, but all wells with this treatment became thickly overgrown with filaments of an unidentified bacterium, preventing normally and abnormally developed animals from being accurately distinguished. This treatment was therefore excluded from analysis. Hatching rates were reported as in the previous experiment but on the fourth day instead of the fifth.

### Effect of heat-killed or low dose bacteria

To determine whether the beneficial effect on hatching could be obtained by exposure to a generic microbial signal (e.g. lipopolysaccharide), we conducted an experiment with *Pseudomonas* and *Brevundimonas* administered either live or heat-killed. Both strains were cultured for 7 days. They were then diluted to OD600 = 0.2 and half of each culture was heat-killed at 80 °C for 1 hour. 20 µl of the live or heat-killed suspensions was added to wells containing 180 µl of sterile ADaM.

To determine whether a low dose of bacteria could produce the beneficial effect, we administered *Pseudomonas* at doses of 200 or 200,000 CFU (as determined by spread-plating dilutions) per egg.

### Timing of bacterial effect

We wished to see whether bacteria would still have a beneficial effect if added after 16 hours of development at the warm temperature. (This timepoint was chosen based on results of a previous pilot study.) We inoculated two separate liquid cultures of *Pseudomonas* from single colonies on LB agar plates, 16 hours apart. The first culture was washed and diluted and added to treated eggs in wells as in the previously described experiments; the second was washed and diluted in the same way 16 hours later and added to a subset of bacteria-free eggs. At this time 20 µl of sterile ADaM was added to both bacteria-free and *Pseudomonas*-treated disturbance control groups. A subset of eggs was inspected with the microscope at 16 hours to approximately determine the average developmental stage at this point, and two *Pseudomonas*-treated individuals were removed from the wells and treated with DAPI stain (VectaShield kit) to visualize bacterial presence on the egg. A standard-temperature treatment was not included in this experiment.

### Effect on directly developing eggs

To examine the effect of temperature and bacteria on non-diapausing eggs, we used parthenogenetic eggs of three different *Daphnia* clones (called Mu12, T2 and T3) originating from the same Munich location as the collected ephippia.

Three isofemale lines were established by hatching ephippia and kept under standard laboratory conditions for several generations before the experiment: 400 ml

jars of ADaM kept at 16:8 light:dark cycle at 20 °C and fed every other day with 50 million cells of the green alga *Scenedesmus sp.*

For the experiment, one-day-old juveniles were placed individually in 100 ml jars filled with ADaM and kept under standard laboratory conditions until they reached maturity. When the first offspring were present, the adult animals were transferred to new jars with fresh medium. Following this, the eggs from the second clutch were collected within 24 h of being deposited, by sucking them out of the brood pouch with a Pasteur pipette and transferring them to a 1.5-ml Eppendorf tube. At this stage, the asexual eggs are still encased in a chorion, similarly to diapausing eggs. The collected eggs were surface-sterilized following the protocol of Peerakietkhajorn et al (2015). In short, the eggs were incubated for 30 min in 0.25% glutaraldehyde and washed three times with sterile water before they were placed individually in the wells of a 96 well plate. Resting eggs from ephippia were surface-sterilized using the same method and included for comparison. *Pseudomonas* suspension or sterile ADaM were added as previously. Wells were checked twice daily for swimming hatchlings.

All statistical analyses were performed using the software package R 3.1.3 (R Core Team). The proportion of freely swimming hatchlings in each condition was analyzed with logistic regression (binomial error distribution with logit link function), setting warm and sterile conditions as the reference levels in each analysis. In the experiment examining directly developing eggs, these eggs were analyzed with a genotype effect included while ephippial eggs were analyzed in a separate model. Binomial confidence intervals were calculated for each treatment combination using the default Wilson method in the R package Hmisc.



## Results

In a comparison of eggs exposed to bacteria-free or “conventionalizing” conditions (addition of a homogenate of lab *Daphnia* with complete microbiota), a clear interaction between temperature and bacterial treatment was observed (Figure 1A). Under standard (20 °C) conditions, bacteria-free and conventionalized eggs had similarly high rates of successful development (i.e. developing to a free-swimming state). Under warm (26-28 °C) conditions, however, the rate of successful development of bacteria-free eggs was dramatically lower compared to conventionalized eggs. Unsuccessful development in all groups consisted of a combination of different outcomes, from eggs displaying no apparent signs of development to a variety of abnormal phenotypes lacking the ability to swim freely (Figure 1B). Observed abnormalities included malformed carapaces and eyes; broken membranes spilling yolk; and stunted appendages with missing setae. A similar difference in successful development under warm conditions was observed using eggs from a population originating from a Finnish rock pool (13/32 (41%) success in bacteria-free, 20/25 (80%) success in conventionalized, Fisher’s exact test  $p=0.003$ ).

In an experiment using single strains of lab-cultured bacteria under warm and standard temperature conditions, the bacteria-free group under warm conditions again had the lowest rate of successful development out of all treatments (Figure 2). Of the bacterial strains tested, the *Pseudomonas sp* strain resulted in the highest rate of successful development under warm conditions, significantly higher than that of the bacteria-free group. Since the *Pseudomonas* strain appeared to recapitulate the effect of *Daphnia* homogenate, further experiments aiming for more controlled conditions were conducted using this strain.

Eggs treated with heat-killed *Pseudomonas* had rates of failure similar to bacteria-free eggs under warm conditions (Figure 3), indicating that the beneficial function of the bacterial cells was inactivated by heat. The *Brevundimonas* strain from the previous experiment was also tested in this experiment; it provided a significant improvement in hatching rates over the bacteria-free condition, but a smaller benefit than *Pseudomonas*. The effect of *Pseudomonas* was also tested at two different doses (Figure 4); the higher dose had a stronger beneficial effect than the low dose.

Adding *Pseudomonas* to bacteria-free embryos 16 hours after they had been placed under warm conditions did not improve rates of successful development over embryos that were bacteria-free for the entirety of the experiment (Figure 5). Therefore bacteria could only rescue the development of embryos if they were already present less than 16 hours after the onset of the warm temperature condition. Observation of a subset of these embryos at 16 hours showed that none of the eggs had yet shed their outer, inflexible membrane. Most of the embryos observed had begun to show some slight differentiation of segments at this point. DAPI staining of eggs exposed to *Pseudomonas* for 16 hours showed bacterial cells irregularly distributed on the surface of the egg, with no apparent pattern.

The bacterial and temperature treatments had no effect on the development success of directly developing parthenogenetic eggs of three different *Daphnia* genotypes (Figure 6). Therefore this effect seems to be limited to resting eggs. Resting egg development showed the same pattern of bacterial and temperature effects in this experiment as in previous ones, indicating that the observed effect was not dependent on whether hypochlorite or glutaraldehyde was used for surface-sterilization.

Overall across our experiments, exposure to bacteria (either whole-*Daphnia* homogenate or *Pseudomonas sp*) increased the odds of successful development under warm conditions by ratios ranging from 4.6 to 21.7 (Table 2).

## **Discussion**

We have shown a consistent positive effect of exposure to bacteria on the successful development of *Daphnia magna* from resting eggs at a temperature of 26-28 °C. Under warm conditions, the rate of successful development of eggs without bacteria in their environment is much lower than that of eggs exposed to bacteria, with a higher incidence of severe morphological abnormalities resulting in fewer freely swimming neonates in bacteria-free conditions. This effect is observable both using a complete suite of *Daphnia*-associated bacteria derived from homogenizing whole adult daphnids, and with at least one individual strain (*Pseudomonas sp*) of bacteria. Since a strain with this positive effect was observed in an arbitrary selection of five bacterial strains from our collection, we assume that this property may be relatively widespread among *Daphnia*-related bacteria. This would be similar to results from studies of mosquitoes, in which a wide range of bacterial strains promoted larval development (Coon et al. 2014).

Interestingly, the mixture of the five strains tested did not have the same beneficial effect as the *Pseudomonas* strain alone, indicating either that *Pseudomonas* was not present at a high enough concentration in the mixture to have an effect, or that the strains in this particular mixture had antagonistic effects on each other with respect to their effect on the embryo. It is unknown to which bacteria, and in which combinations, eggs would be exposed in natural settings. The ephippia in which eggs are deposited are derived from maternal carapaces, and bacteria have been observed on their internal surfaces (Schultz 1977). Many egg-containing ephippia collected from natural sediments are partially degraded or not completely sealed (personal observation), permitting exposure to environmental bacteria. Natural environments would almost certainly contain harmful bacteria in addition to potentially beneficial ones, making the effects of bacteria in natural settings difficult to predict.

Among the animals that failed to develop normally, abnormality appeared to arise at different developmental stages. Among those that resembled undifferentiated eggs at the end of the experiment, our methods could not distinguish whether this was due to developmental failure/death at a very early stage or due to continued diapause. Bacteria could be involved in diapause termination, analogously to bacteria that induce metamorphosis between life stages in some marine invertebrates (Shikuma et al. 2014). However, a majority of the unsuccessful outcomes consisted of visibly initiated but abnormal development, so we presume that the effect observed in this experiment is primarily one related to embryonic development in general rather than diapause termination specifically. Nonetheless, organisms with a diapausing embryonic stage are an interesting case study on the subject of ecological dimensions of development (Gilbert & Epel 2009), since they face a unique set of challenges related to the developmental environment: they must be impervious to environmental conditions for the length of diapause, respond appropriately to cues indicating favorable conditions for emerging from diapause, and complete development in environments potentially very different from those experienced by their parents. Understanding the environmental parameters that affect successful development in these organisms could therefore be useful for understanding how these complex responses are regulated.

It is unclear whether the observed effect of bacteria is indirect or direct; e.g. whether bacteria act by modifying the chemical or physical environment around the egg, thus creating conditions more favorable for development, or whether bacteria are

engaged in some kind of specific, direct molecular interaction with the developing embryo. A combination of indirect and direct effects is also possible. For example, in *Aedes aegypti* mosquitoes, bacteria were hypothesized to stimulate hatching by decreasing the dissolved oxygen concentration locally around eggs (Gillett et al. 1977), but also appeared to have a stimulating effect at high oxygen conditions (Ponnusamy et al. 2011). Such observations highlight the necessity of keeping microbial activities in mind as environmental factors that modify the effects of other environmental parameters. Normal development failed to be rescued when we added bacteria to bacteria-free embryos after 16 hours of development at the warm temperature. This could be either because this window represents a critical phase in the development of the embryo, or because it takes longer than 16 hours for the beneficial effect of the bacteria to take effect (e.g. if a bacterially produced factor must accumulate to a certain level in the water before it can benefit embryos).

The phenotypes observed in this experiment were not completely penetrant. Developmental abnormalities were diverse and occurred at many different stages. A fraction of individuals failed to develop normally in all treatments (consistent with previous observations of resting egg hatching), and a portion (usually 30-50%) of individuals successfully developed to a freely swimming stage even in the warm, bacteria-free treatment. This could reflect heterogeneity in the experimental conditions (e.g. between wells of the culture plates) or heterogeneity in the embryos. The field-collected resting eggs used in this study vary in genotype, size, length of time since deposition, and most likely maternal condition. Accordingly, there could be genetic or maternal factors that affect the extent to which an individual is sensitive to temperature and bacteria. Strong genetic variation in responses to microbiota has been observed in *Drosophila* nutrition-related traits (Dobson et al. 2015). The outcomes observed here resemble environmental canalization (Flatt 2005), with bacteria in some way contributing to the homeostatic mechanism that stabilizes the phenotypic outcome under the elevated temperature condition. Stressful conditions reveal cryptic phenotypic variation in many organisms (Badyaev 2005); our results suggest that such conditions may reveal cryptic variation in dependency on microorganisms. Viewed another way, given that many stress responses are generalized (Feder & Hofmann 1999; Jones et al. 2015), it is possible that pathways activated by exposure to bacteria are also protective against heat. Since resting egg hatching occurs not only in spring, but also in

summer when dried-out shallow pools are refilled by rain, some populations could either regularly or unpredictably experience the temperatures used in our experiments.

The development of parthenogenetic eggs of three different genotypes was unaffected by either temperature or bacterial presence in our experiment. The beneficial role of bacteria could be related to specific characteristics of resting eggs, such as the tertiary membrane. On the other hand, one study reported high rates of inviability and developmental abnormalities in the parthenogenetic eggs of microbiota-free *Daphnia* mothers under sterile conditions (Peerakietkhajorn et al. 2015). Since gut microbiota are thought to contribute to the nutrition of adult *Daphnia* (Gorokhova et al. 2015), and resting eggs are often produced under conditions of high crowding that are accompanied by food scarcity, sensitivity to absence of bacteria could be a characteristic of eggs produced by undernourished mothers. Studies have demonstrated various effects of maternal nutritional status on disease resistance of offspring (Mitchell & Read 2005). If the effect observed here involves cross-talk between immune-related and other developmental signaling pathways, interesting connections could be made to studies in ecoimmunology investigating connections between health, disease and various ecological stressors.

Extended exposure to sodium hypochlorite of developing *Daphnia* resting embryos is toxic (Raikow et al. 2007), while brief exposure to sodium hypochlorite of uninduced resting eggs is a routine laboratory procedure (Luijckx et al. 2012) which has no apparent negative effects when eggs are hatched in conventional (nonsterile) conditions. In our experiments, eggs briefly (5 minutes) exposed to sodium hypochlorite and then re-inoculated with bacteria had restored or elevated hatching success compared to eggs kept sterile after exposure. Therefore it is possibly worth expanding toxicological studies to investigate whether the effects of toxic compounds or other stressors on animals could be partly due to their effects on microbes in the animals' environment. Similarly, transformation of toxicants by bacteria in the environment may be another critical parameter in determining safe exposure levels.

The molecular basis of the developmental abnormalities observed in these experiments is unknown, but some similar morphological abnormalities in *Daphnia* are reported in the ecotoxicology literature as consequences of exposure to chemicals with endocrine-disrupting properties, particularly with effects on ecdysteroids (Mu & Leblanc 2002; Flaherty & Dodson 2005). Since ecdysone signaling is also involved in

processes dependent on bacteria (i.e. invertebrate immune response) (Regan et al. 2013; Rus et al. 2013), we speculate that absence of bacteria could result in hormonal dysregulation with negative consequences for development. Several studies have noted the close link between innate immune regulation and regulation of development and growth (Shin et al. 2011; McFall-Ngai 2002), and the coincident signaling pathways underlying both (McFall-Ngai et al. 2013; Hayden & Ghosh 2004). Since animal developmental programs evolved in the presence of bacteria, it is conceivable that normal development can depend on processes sensitive to bacterial presence even in early stages. It remains to be seen how relevant the effect observed here is in natural settings; however, these findings potentially have general relevance to the understanding of the complex ecological dimensions of development and of the effects of bacterial activities on other organisms in the ecosystem.

### ***Acknowledgements***

Many thanks to Viktor Misslin and Daniel Lüscher for constructing the plate-cooling device used in these experiments and Jürgen Hottinger for general laboratory assistance. We also thank Sebastian Gygli and Louis Du Pasquier for their comments on the manuscript. This research was supported by an ERC Advanced Grant (268596 - MicrobiotaEvolution).

### ***Author contributions***

AAM designed and performed all experiments, analyzed data and wrote the paper. EB identified and cultured bacterial strains. TMMS set up the experiment involving parthenogenetic eggs. DE designed experiments and edited the paper.

## References

- Altermatt, F. & Ebert, D., 2008. Genetic diversity of *Daphnia magna* populations enhances resistance to parasites. *Ecology Letters*, 11(9), pp.918–928.
- Badyaev, A. V., 2005. Stress-induced variation in evolution: from behavioural plasticity to genetic assimilation. *Proceedings. Biological sciences / The Royal Society*, 272(1566), pp.877–86.
- Baldass, F., 1941. Entwicklung von *Daphnia pulex*. In *Zoologische Jahrbuecher: Abteilung fur Anatomie und Ontogenie der Tiere*. pp. 1–60.
- Bates, J.M. et al., 2006. Distinct signals from the microbiota promote different aspects of zebrafish gut differentiation. *Developmental biology*, 297(2), pp.374–86.
- Breton, J. et al., 2013. Gut microbiota limits heavy metals burden caused by chronic oral exposure. *Toxicology letters*, 222(2), pp.132–8.
- Colbourne, J.K. et al., 2011. The ecoresponsive genome of *Daphnia pulex*. *Science (New York, N.Y.)*, 331(6017), pp.555–61.
- Coon, K.L. et al., 2014. Mosquitoes rely on their gut microbiota for development. *Molecular ecology*, 23(11), pp.2727–39.
- Dobson, A.J. et al., 2015. Host genetic determinants of microbiota-dependent nutrition revealed by genome-wide analysis of *Drosophila melanogaster*. *Nature Communications*, 6, pp.1–7.
- Douglas, A.E., 2014. Symbiosis as a general principle in eukaryotic evolution. *Cold Spring Harbor Perspectives in Biology*, 6(2).
- EBERT, D., 2011. A Genome for the Environment. *Science*, 331(6017), pp.539–540.
- Feder, M.E. & Hofmann, G.E., 1999. Heat-shock proteins, molecular chaperones, and the stress response: evolutionary and ecological physiology. *Annual review of physiology*, 61(c), pp.243–82.
- Flaherty, C.M. & Dodson, S.I., 2005. Effects of pharmaceuticals on *Daphnia* survival, growth, and reproduction. *Chemosphere*, 61(2), pp.200–7.
- Flatt, T., 2005. The evolutionary genetics of canalization. *The Quarterly review of biology*, 51(2), pp.211–44.
- Freeland, W. & Janzen, D.H., 1974. Strategies in Herbivory by Mammals: the role of plant secondary compounds. *The American Naturalist*, 108(961).
- Frisch, D. et al., 2014. A millennial-scale chronicle of evolutionary responses to cultural eutrophication in *Daphnia*. *Ecology letters*, 17(3), pp.360–8.
- Galindo-Villegas, J. et al., 2012. Regulation of immunity and disease resistance by commensal microbes and chromatin modifications during zebrafish development. *Proceedings of the National Academy of Sciences of the United States of America*, 109(39), pp.E2605–14.
- Gil-Turnes, M.S., Hay, M.E. & Fenical, W., 1989. Symbiotic Marine Bacteria Chemically Defend Crustacean Embryos from a Pathogenic Fungus. *Science*, 246(4926),



pp.116–118.

- Gilbert, S.F. & Epel, D., 2009. *Ecological Developmental Biology*, Sinauer Associates.
- Gillett, J.D., Roman, E. a & Phillips, V., 1977. Erratic hatching in *Aedes* eggs: a new interpretation. *Proceedings of the Royal Society of London. Series B, Containing papers of a Biological character. Royal Society (Great Britain)*, 196(1123), pp.223–32.
- Gorokhova, E. et al., 2015. Bacteria-mediated effects of antibiotics on *Daphnia* nutrition. *Environmental Science & Technology*, p.150407112153003.
- Hairston, N.G., 1996. Zooplankton egg banks as biotic reservoirs in changing environments. *Limnology and Oceanography*, 41(5), pp.1087–1092.
- Hayden, M.S. & Ghosh, S., 2004. Signaling to NF-kappa B. *Genes and Development*, pp.2195–2224.
- van der Heijden, M.G. a, Bardgett, R.D. & van Straalen, N.M., 2008. The unseen majority: soil microbes as drivers of plant diversity and productivity in terrestrial ecosystems. *Ecology letters*, 11(3), pp.296–310.
- Howard, E.C. et al., 2006. Bacterial taxa that limit sulfur flux from the ocean. *Science (New York, N.Y.)*, 314(5799), pp.649–52.
- Ivanov, I.I. et al., 2009. Induction of Intestinal Th17 Cells by Segmented Filamentous Bacteria. *Cell*, 139(3), pp.485–498.
- Jones, R.M. et al., 2015. Lactobacilli Modulate Epithelial Cytoprotection through the Nrf2 Pathway. *Cell Reports*, pp.1–9.
- Kiers, E.T. et al., 2010. Mutualisms in a changing world: an evolutionary perspective. *Ecology letters*, 13(12), pp.1459–74.
- Kohl, K.D. et al., 2014. Gut microbes of mammalian herbivores facilitate intake of plant toxins. *Ecology Letters*, 17(10).
- Luijckx, P. et al., 2012. Resistance to a bacterial parasite in the crustacean *Daphnia magna* shows Mendelian segregation with dominance. *Heredity*, 108(5), pp.547–551.
- Lynch, M. & Ennis, R., 1983. Resource availability, maternal effects, and longevity. *Experimental Gerontology*, 18, pp.147–165.
- Márquez, L.M. et al., 2007. A virus in a fungus in a plant: three-way symbiosis required for thermal tolerance. *Science (New York, N.Y.)*, 315(5811), pp.513–5.
- Martens, E.C. et al., 2011. Recognition and degradation of plant cell wall polysaccharides by two human gut symbionts. *PLoS biology*, 9(12), p.e1001221.
- McFall-Ngai, M. et al., 2013. Animals in a bacterial world, a new imperative for the life sciences. *Proceedings of the National Academy of Sciences of the United States of America*, 110(9), pp.3229–3236.
- McFall-Ngai, M., 2002. Unseen Forces: The Influence of Bacteria on Animal Development. *Developmental Biology*, 242(1), pp.1–14.
- Mitchell, S.E. & Read, A.F., 2005. Poor maternal environment enhances offspring disease

- resistance in an invertebrate. *Proceedings. Biological sciences / The Royal Society*, 272(1581), pp.2601–2607.
- Mu, X. & Leblanc, G.A., 2002. Environmental Antiecdysteroids Alter Embryo Development in the Crustacean *Daphnia magna*. *Journal of Experimental Zoology*, 292, pp.287–292.
- Musolin, D.L., Tougou, D. & Fujisaki, K., 2010. Too hot to handle? Phenological and life-history responses to simulated climate change of the southern green stink bug *Nezara viridula* (Heteroptera: Pentatomidae). *Global Change Biology*, 16(1), pp.73–87.
- Navis, S. et al., 2015. Timing matters : Sensitivity of *Daphnia magna* dormant eggs to fenoxycarb exposure depends on embryonic developmental stage. *Aquatic Toxicology*, 159, pp.176–183.
- Peerakietkhajorn, S. et al., 2015. Betaproteobacteria Limnohabitans strains increase fecundity in the crustacean *Daphnia magna*: Symbiotic relationship between major bacterioplankton and zooplankton in freshwater ecosystem. *Environmental Microbiology*, p.n/a–n/a.
- Ponnusamy, L. et al., 2011. Bacteria stimulate hatching of yellow fever mosquito eggs. *PloS one*, 6(9), p.e24409.
- R Core Team, ., R: A language and environment for statistical computing. Available at: <http://www.r-project.org/>.
- Raikow, D.E., Landrum, P.E. & Reid, D.E., 2007. Aquatic invertebrate resting egg sensitivity to glutaraldehyde and sodium hypochlorite. *Environmental toxicology and chemistry / SETAC*, 26(8), pp.1770–1773.
- Regan, J.C. et al., 2013. Steroid hormone signaling is essential to regulate innate immune cells and fight bacterial infection in *Drosophila*. *PLoS pathogens*, 9(10), p.e1003720.
- Rus, F. et al., 2013. Ecdysone triggered PGRP-LC expression controls *Drosophila* innate immunity. *The EMBO journal*, 32(11), pp.1626–38.
- Schultz, T.W., 1977. Fine structure of the ephippium of *Daphnia pulex* (Crustacea: Cladocera). *Transactions of the American Microscopical Society*, 96(3), pp.313–321.
- Semova, I. et al., 2012. Microbiota regulate intestinal absorption and metabolism of fatty acids in the zebrafish. *Cell host & microbe*, 12(3), pp.277–88.
- Senderovich, Y. & Halpern, M., 2013. The protective role of endogenous bacterial communities in chironomid egg masses and larvae. *The ISME journal*, 7, pp.1–12.
- Shikuma, N.J. et al., 2014. Marine Tubeworm Metamorphosis Induced by Arrays of Bacterial Phage Tail-Like Structures. *Science (New York, N.Y.)*, (January), pp.1–8.
- Shin, S.C. et al., 2011. *Drosophila* microbiome modulates host developmental and metabolic homeostasis via insulin signaling. *Science (New York, N.Y.)*, 334(6056), pp.670–4.
- Sison-Mangus, M.P., Mushegian, A.A. & Ebert, D., 2014. Water fleas require microbiota for survival, growth and reproduction. *The ISME journal*, pp.1–9.
- Smirnov, N., 2014. Reproduction. In *Physiology of the Cladocera*. pp. 143–147.

- Vanvlasselaer, E. & De Meester, L., 2010. An Exploratory Review on the Molecular Mechanisms of Diapause Termination in the Waterflea, *Daphnia*. In E. Lubzens, J. Cerda, & M. Clark, eds. *Dormancy and Resistance in Harsh Environments*. Springer Berlin Heidelberg, pp. 189–202.
- Wernegreen, J.J., 2012. Mutualism meltdown in insects: bacteria constrain thermal adaptation. *Current opinion in microbiology*, 15(3), pp.255–62.
- Xie, B. et al., 2013. *Chlamydomonas reinhardtii* thermal tolerance enhancement mediated by a mutualistic interaction with vitamin B12-producing bacteria. *The ISME journal*, 7(8), pp.1544–55.
- Zheng, X. et al., 2013. Melamine-induced renal toxicity is mediated by the gut microbiota. *Science translational medicine*, 5(172), p.172ra22.

## Figures

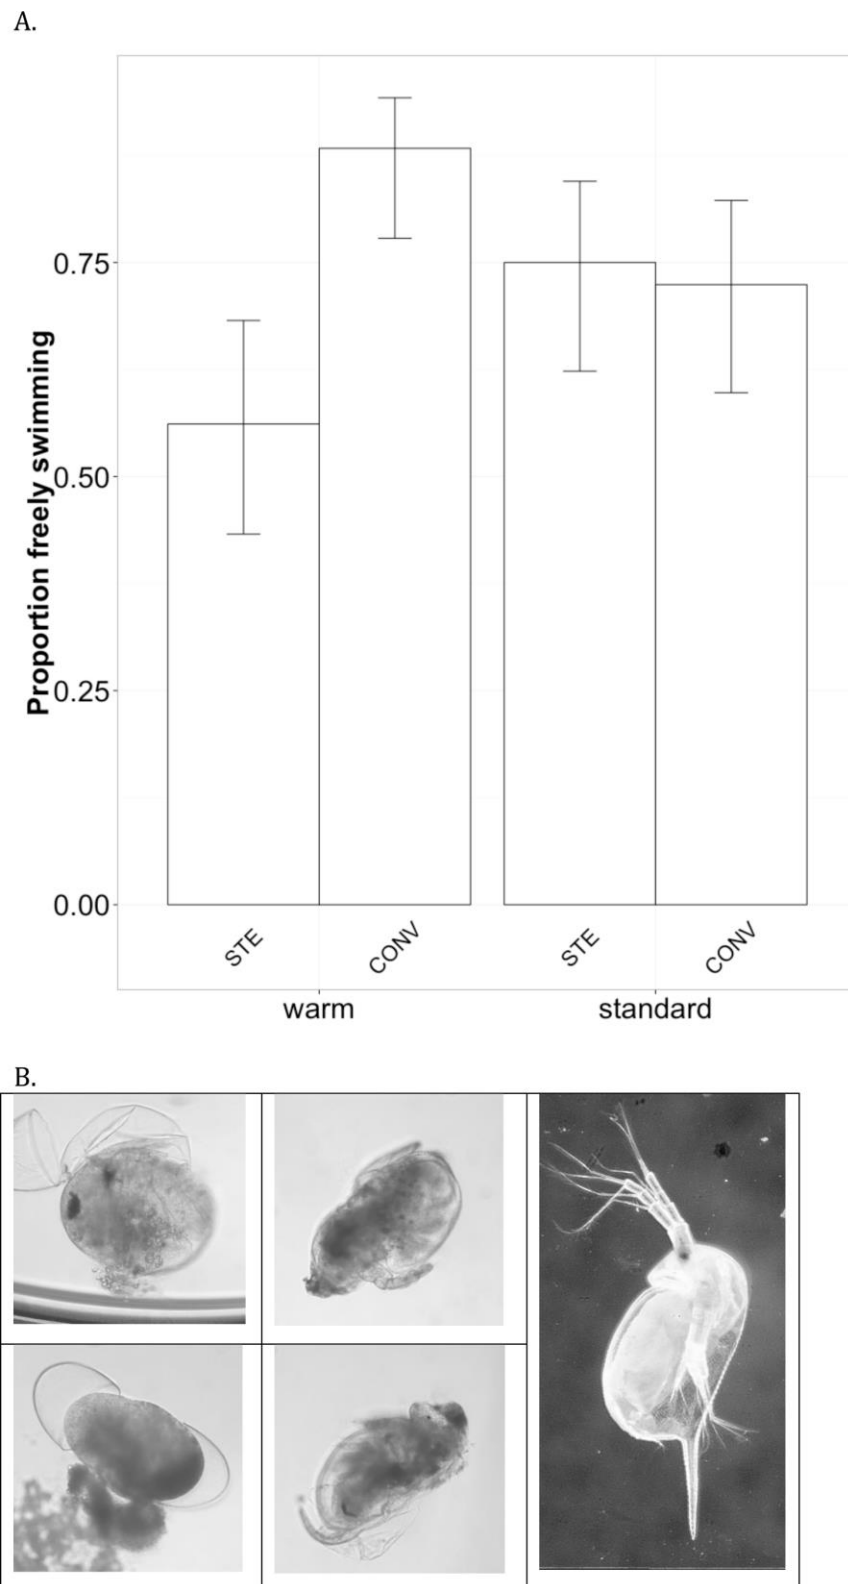

Figure 1.

A) Proportions of resting eggs that reached a free-swimming state under warm and standard, bacteria-free (STE) and conventionalized (CONV) conditions. N=57 to 60

individuals in each treatment combination. Error bars represent 95% binomial confidence intervals. Odds ratio for CONV vs STE under warm conditions: 5.9. For logistic regression results see Table 1A. B) Examples of developmental abnormalities observed; photos shown are from warm, bacteria-free condition of experiment. At right, an example of a normally developed neonate; image compiled from stacked photographs of an immobilized individual. Photos have been converted to grayscale, and brightness and contrast have been adjusted.

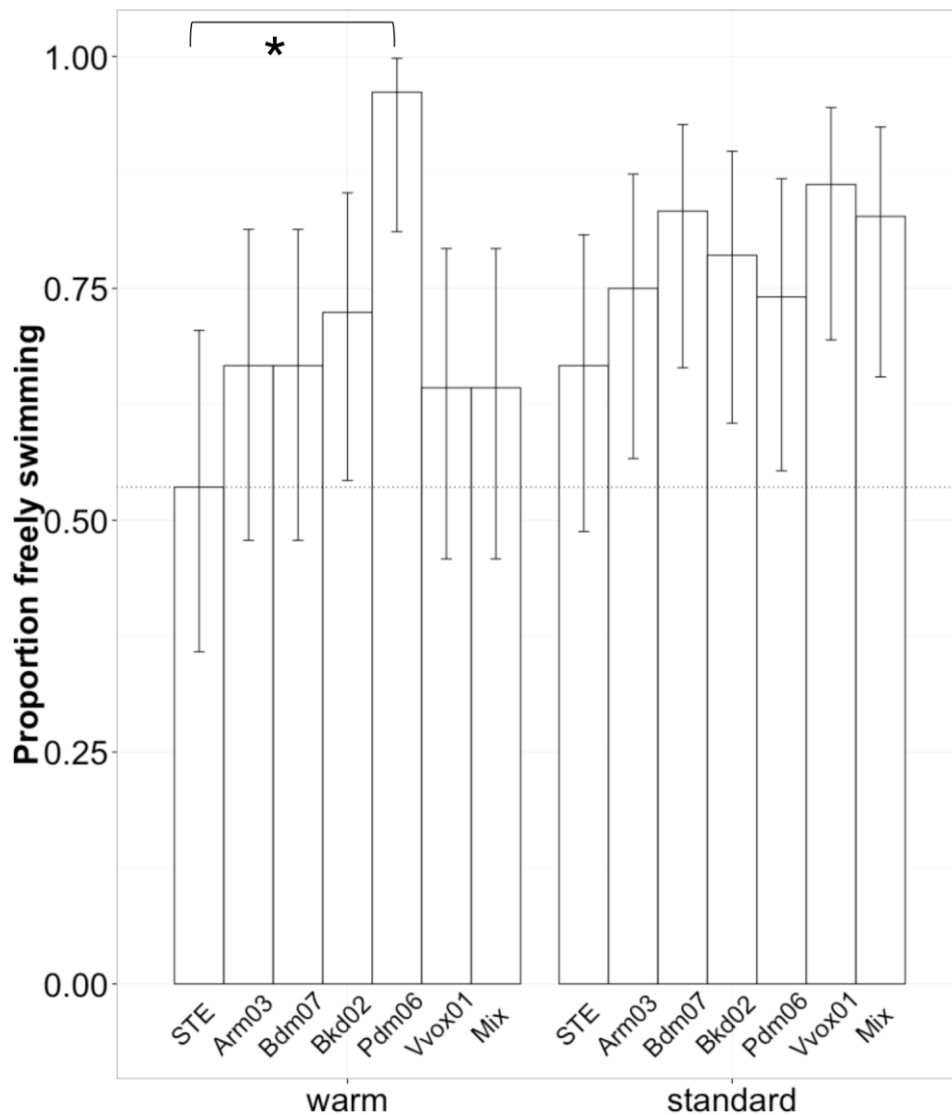

Figure 2. Proportions of resting eggs reaching a free-swimming state when exposed to different bacterial strains under warm and standard temperature conditions. STE=bacteria-free, Arm03=*Aeromonas sp*, Bdm07=*Brevundimonas sp*, Bkd02=*Burkholderiales sp*, Pdm06=*Pseudomonas sp*, Vvox01=*Variovorax sp*, Mix=mixture of these five bacterial strains. N=26 to 30 in each treatment combination. Asterisk represents significant difference according to Fisher's Exact Test (see Table 2). Odds ratio for Pdm06 vs. sterile under warm condition: 21.7. Error bars represent 95% binomial confidence intervals. For logistic regression results see Table 1B.

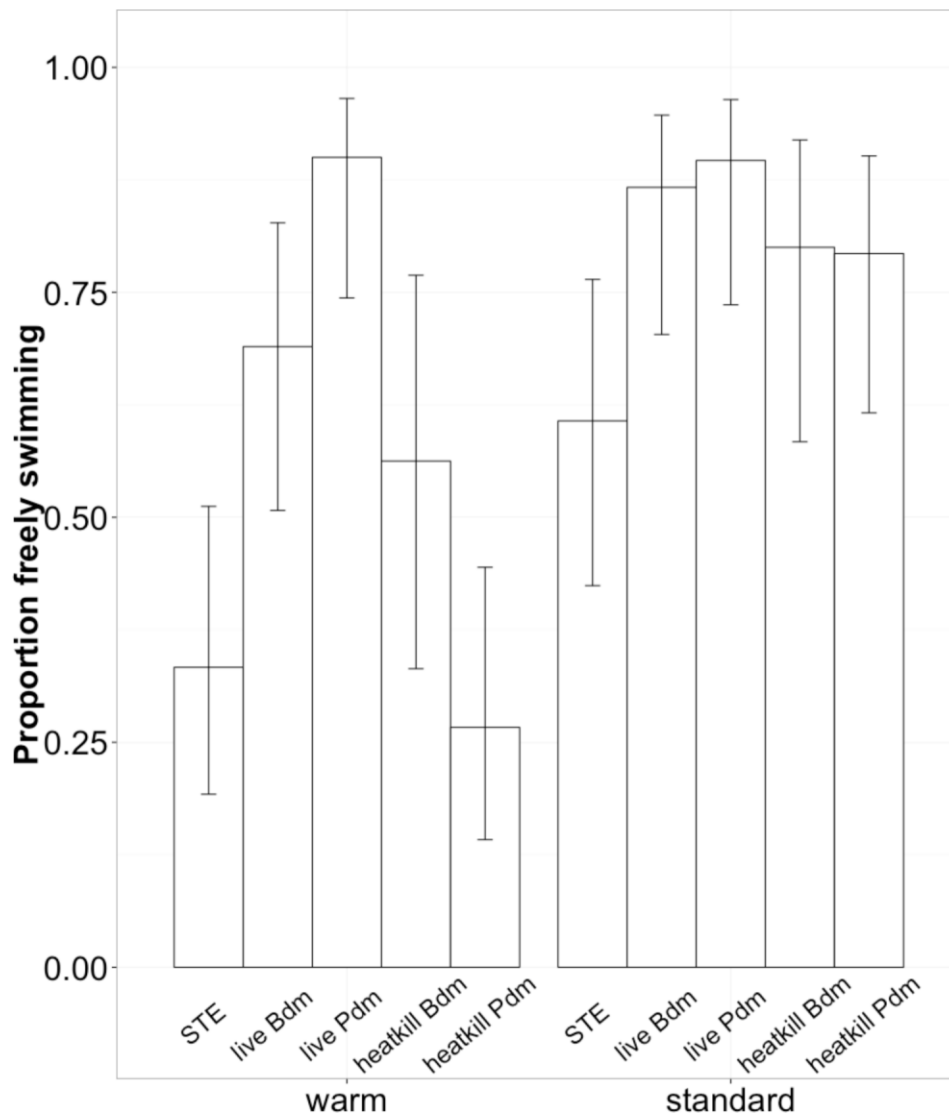

Figure 3.

Proportions of resting eggs reaching a free-swimming state when exposed to live and heat-killed *Pseudomonas* (Pdm) and *Brevundimonas* (Bdm) under warm and standard temperature conditions. N=28 to 30 in each treatment combination except for heatkill Bdm/warm: n=16. Odds ratio for live Pseudomonas vs. sterile under warm condition: 18. Error bars represent 95% binomial confidence intervals. For logistic regression results see Table 1C.

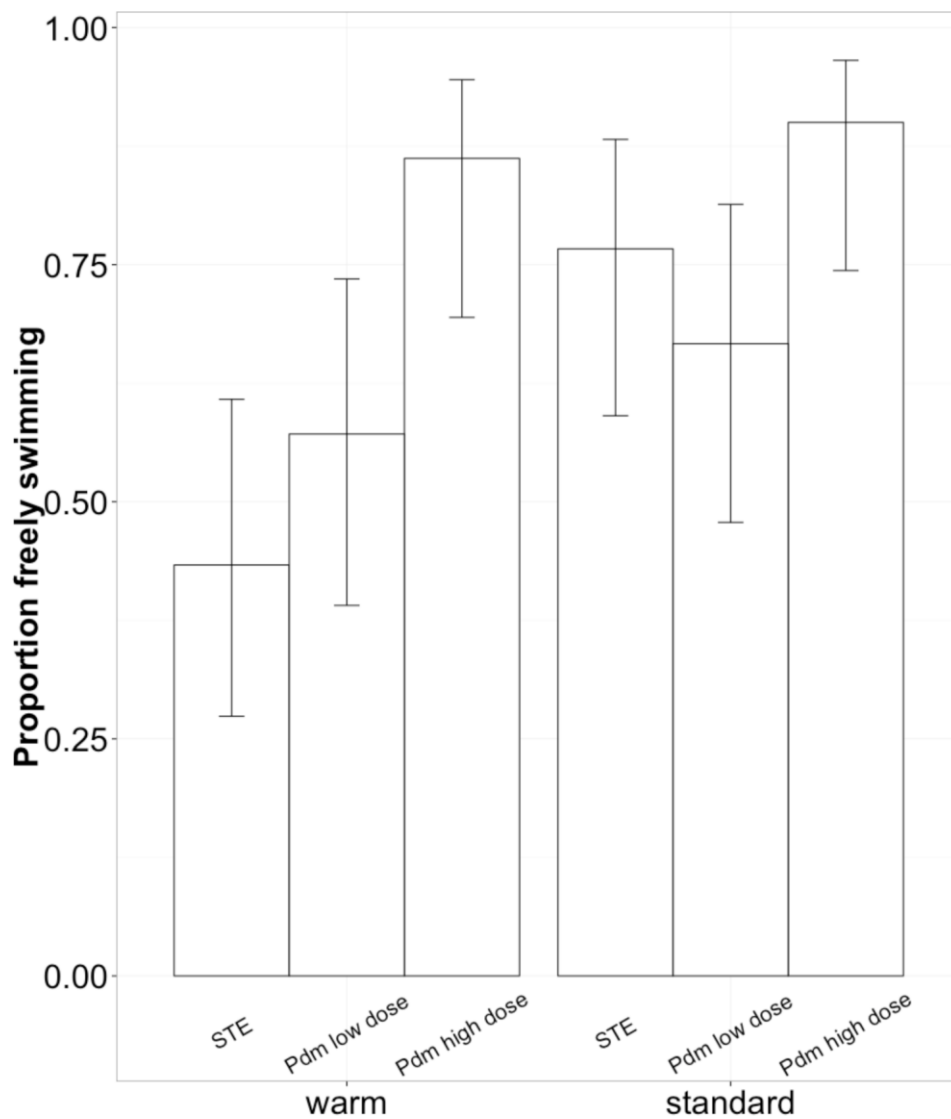

Figure 4.

Proportions of resting eggs reaching a free-swimming state when exposed to different doses of *Pseudomonas* (Pdm) bacteria. N=27 to 30 in each treatment combination. Error bars represent 95% binomial confidence intervals. Odds ratio for *Pseudomonas* high dose vs. sterile: 8.22. For logistic regression results see Table 1D.



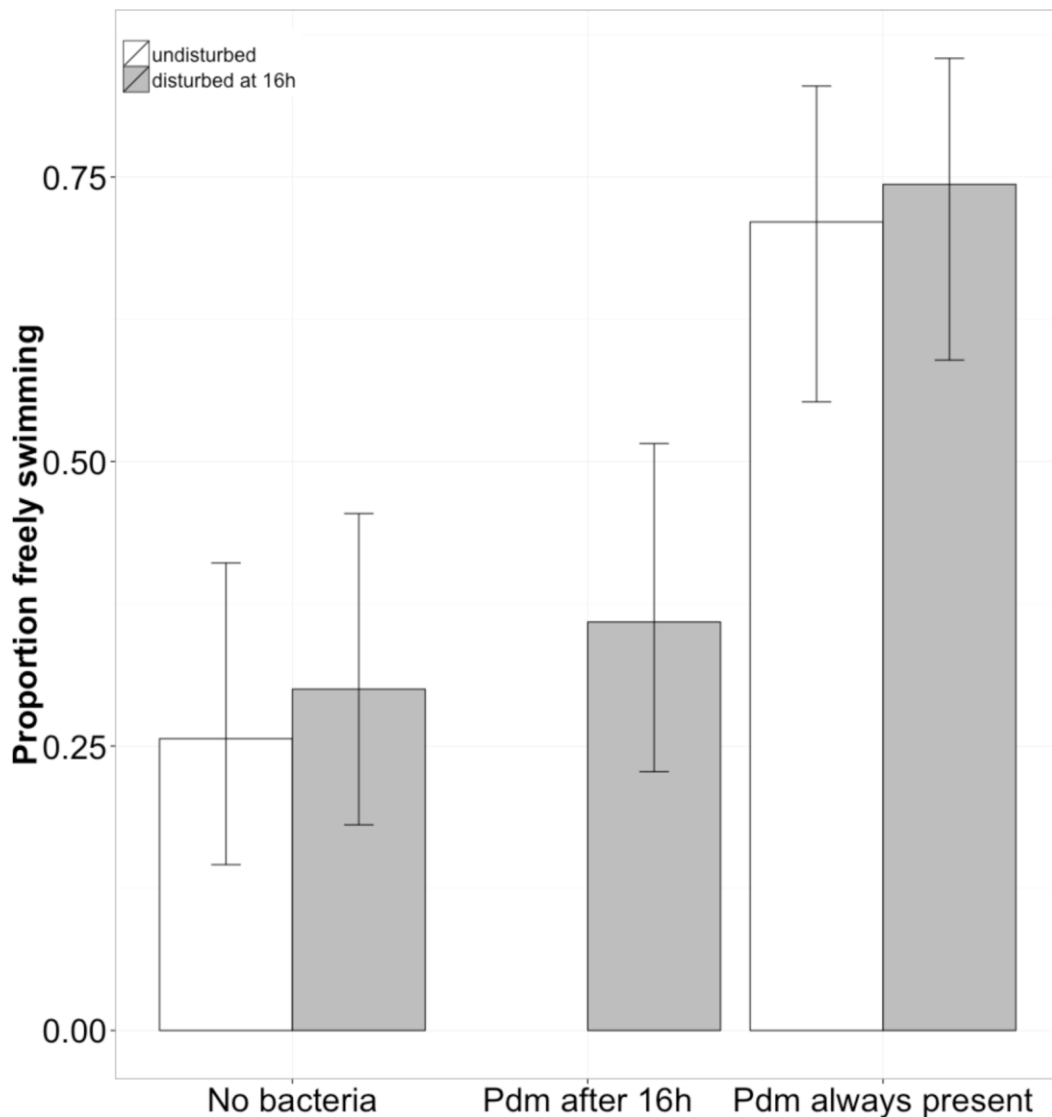

Figure 5.

Comparison of successful development rates of eggs exposed to *Pseudomonas* from beginning of experiment or after 16 hours of bacteria-free development under warm conditions. Control treatments disturbed by pipetting at 16 hours are included. N=38 to 40 per treatment group. Error bars represent binomial confidence intervals. Odds ratio for *Pseudomonas* always present vs. no bacteria: 7.2. For logistic regression results see Table 1E.

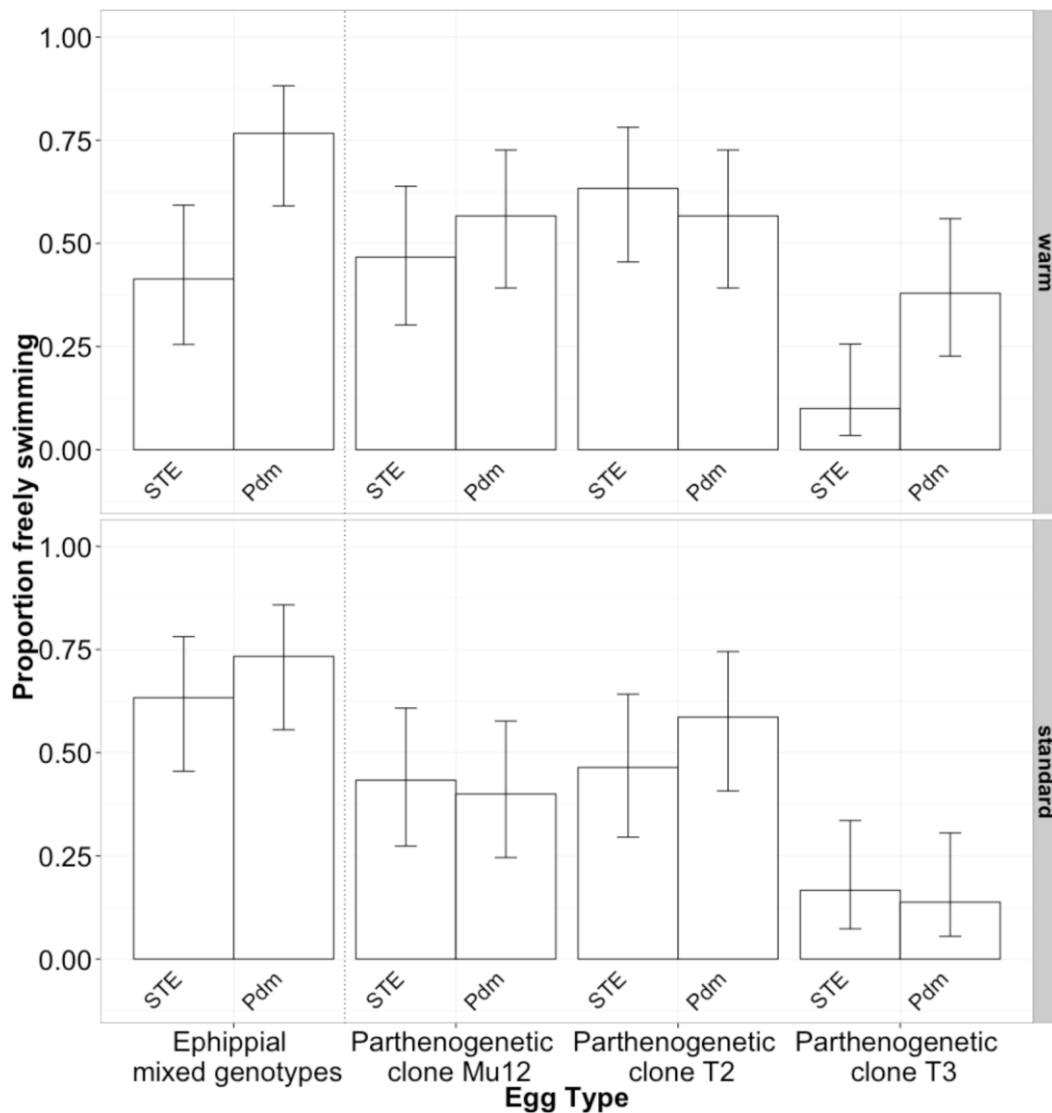

Figure 6

Effect of bacteria-free (STE) and *Pseudomonas*-exposed (Pdm) conditions on development at standard and warm temperature for directly developing parthenogenetic eggs of three different *Daphnia* clones as well as ephippial eggs. N=29 to 30 per treatment combination. Error bars represent 95% binomial confidence intervals. Separate logistic regressions were performed for ephippial and parthenogenetic eggs, setting sterile and warm condition as reference level in both. Odds ratio for ephippial eggs *Pseudomonas*-exposed vs. sterile under warm conditions: 4.7. For logistic regression results see Table 1F.

## Tables

Table 1.

Coefficients of logistic regressions. In all models, sterile and warm conditions are set as the reference levels unless otherwise noted. Asterisks represent p-values significant at the .05 (\*), .01 (\*\*), and .001 (\*\*\*) alpha levels.

|                                                                                                                                                    | <b>Estimate</b> | <b>Std. Error</b> | <b>z value</b> | <b>Pr(&gt; z )</b> |
|----------------------------------------------------------------------------------------------------------------------------------------------------|-----------------|-------------------|----------------|--------------------|
| <b>A. Effect of conventionalizing bacterial mixture (Figure 1)</b>                                                                                 |                 |                   |                |                    |
| (Intercept)                                                                                                                                        | 0.2469          | 0.2669            | 0.925          | 0.355058           |
| CONV                                                                                                                                               | 1.7775          | 0.4827            | 3.683          | 0.000231 ***       |
| STANDARD temp                                                                                                                                      | 0.8518          | 0.4080            | 2.087          | 0.036845 *         |
| CONV:STANDARD                                                                                                                                      | -1.9111         | 0.6438            | -2.968         | 0.002995 **        |
| <b>B. Effect of individual bacterial isolates (Figure 2)</b>                                                                                       |                 |                   |                |                    |
| (Intercept)                                                                                                                                        | 0.1431          | 0.3789            | 0.378          | 0.70570            |
| Arm03                                                                                                                                              | 0.5500          | 0.5570            | 0.988          | 0.32340            |
| Bdm07                                                                                                                                              | 0.5500          | 0.5570            | 0.988          | 0.32340            |
| Bkd02                                                                                                                                              | 0.8220          | 0.5623            | 1.462          | 0.14381            |
| Mix                                                                                                                                                | 0.4447          | 0.5469            | 0.813          | 0.41619            |
| Pdm06                                                                                                                                              | 3.0758          | 1.0876            | 2.828          | 0.00468 **         |
| Vvox01                                                                                                                                             | 0.4447          | 0.5469            | 0.813          | 0.41619            |
| STANDARD                                                                                                                                           | 0.5500          | 0.5418            | 1.015          | 0.31004            |
| Arm03:STANDARD                                                                                                                                     | -0.1446         | 0.8067            | -0.179         | 0.85776            |
| Bdm07:STANDARD                                                                                                                                     | 0.3662          | 0.8368            | 0.438          | 0.66163            |
| Bkd02:STANDARD                                                                                                                                     | -0.2158         | 0.8236            | -0.262         | 0.79327            |
| Mix:STANDARD                                                                                                                                       | 0.4308          | 0.8312            | 0.518          | 0.60425            |
| Pdm06:STANDARD                                                                                                                                     | -2.7191         | 1.2352            | -2.201         | 0.02771 *          |
| Vvox01:STANDARD                                                                                                                                    | 0.6947          | 0.8597            | 0.808          | 0.41904            |
| <b>C. Effect of heatkilled bacteria (Figure 3)</b>                                                                                                 |                 |                   |                |                    |
| (Intercept)                                                                                                                                        | -0.693147       | 0.387298          | -1.790         | 0.07350 .          |
| live Bdm                                                                                                                                           | 1.491655        | 0.557773          | 2.674          | 0.00749 **         |
| heatkilled Bdm                                                                                                                                     | 0.944462        | 0.635585          | 1.486          | 0.13729            |
| live Pdm                                                                                                                                           | 2.890372        | 0.721325          | 4.007          | 6.15e-05 ***       |
| heatkilled Pdm                                                                                                                                     | -0.318454       | 0.566087          | -0.563         | 0.57374            |
| STANDARD temp                                                                                                                                      | 1.128465        | 0.547478          | 2.061          | 0.03928 *          |
| live Bdm:STANDARD                                                                                                                                  | -0.055171       | 0.865624          | -0.064         | 0.94918            |
| heatkill Bdm:STANDARD                                                                                                                              | 0.006515        | 0.930699          | 0.007          | 0.99442            |
| livePdm:STANDARD                                                                                                                                   | -1.166206       | 1.020683          | -1.143         | 0.25322            |
| heatkillPdm:STANDARD                                                                                                                               | 1.226870        | 0.824822          | 1.487          | 0.13690            |
| <b>D. Effect of low dose of Pseudomonas (Figure 4)</b>                                                                                             |                 |                   |                |                    |
| (Intercept)                                                                                                                                        | -0.2683         | 0.3684            | -0.728         | 0.46655            |
| Pdm high dose                                                                                                                                      | 2.1008          | 0.6525            | 3.220          | 0.00128 **         |
| Pdm low dose                                                                                                                                       | 0.5559          | 0.5306            | 1.048          | 0.29478            |
| STANDARD temp                                                                                                                                      | 1.4578          | 0.5675            | 2.569          | 0.01021 *          |
| Pdm high dose:STANDARD                                                                                                                             | -1.0932         | 0.9912            | -1.103         | 0.27004            |
| Pdm low dose:STANDARD                                                                                                                              | -1.0524         | 0.7966            | -1.321         | 0.18647            |
| <b>E. Effect of adding Pseudomonas after 16h of development under warm conditions (Figure 5). Sterile and undisturbed set as reference levels.</b> |                 |                   |                |                    |
| (Intercept)                                                                                                                                        | -1.0516         | 0.3147            | -3.342         | 0.000832 ***       |
| Pdm added 16h                                                                                                                                      | 0.2792          | 0.4509            | 0.619          | 0.535786           |
| Pdm always                                                                                                                                         | 1.9370          | 0.3591            | 5.394          | 6.89e-08 ***       |
| disturbed                                                                                                                                          | 0.1925          | 0.3591            | 0.536          | 0.591799           |

|                                                                    | <b>Estimate</b> | <b>Std. Error</b> | <b>z value</b> | <b>Pr(&gt; z )</b> |
|--------------------------------------------------------------------|-----------------|-------------------|----------------|--------------------|
| <i>F. Effects on ehippial and parthenogenetic eggs (Figure 6).</i> |                 |                   |                |                    |
| <i>Ehippial eggs</i>                                               |                 |                   |                |                    |
| (Intercept)                                                        | -0.3483         | 0.3770            | -0.924         | 0.35559            |
| Pdm                                                                | 1.5379          | 0.5731            | 2.683          | 0.00729 **         |
| STANDARD temp                                                      | 0.8949          | 0.5345            | 1.674          | 0.09410 .          |
| Pdm:STANDARD                                                       | -1.0728         | 0.8016            | -1.338         | 0.18075            |
| <i>Parthenogenetic eggs</i>                                        |                 |                   |                |                    |
| (Intercept)                                                        | -0.1335         | 0.3660            | -0.365         | 0.71520            |
| Pdm                                                                | 0.4018          | 0.5193            | 0.774          | 0.43910            |
| STANDARD temp                                                      | -0.1347         | 0.5193            | -0.259         | 0.79529            |
| Clone T2                                                           | 0.6801          | 0.5268            | 1.291          | 0.19668            |
| Clone T3                                                           | -2.0637         | 0.7101            | -2.906         | 0.00366 **         |
| Pdm:STANDARD                                                       | -0.5390         | 0.7378            | -0.731         | 0.46504            |
| Pdm:T2                                                             | -0.6801         | 0.7409            | -0.918         | 0.35868            |
| Pdm:T3                                                             | 1.3030          | 0.8868            | 1.469          | 0.14177            |
| STANDARD:T2                                                        | -0.5549         | 0.7462            | -0.744         | 0.45708            |
| STANDARD: T3                                                       | 0.7225          | 0.9381            | 0.770          | 0.44117            |
| Pdm:STANDARD:T2                                                    | 1.3087          | 1.0533            | 1.243          | 0.21405            |
| Pdn:STANDARD: T3                                                   | -1.3889         | 1.2614            | -1.101         | 0.27086            |

Table 2. Consistent effects of conventionalizing bacteria or *Pseudomonas sp* across experiments. Shown are odds ratios of successful development of the bacterial treatment significantly differing from sterile reference condition in each experiment.

| Experiment/trial | Warm condition        |                             | Standard condition   |                       |
|------------------|-----------------------|-----------------------------|----------------------|-----------------------|
|                  | Odds ratio            | Fisher's exact test p-value | Odds ratio           | Fisher's exact test p |
| <i>Fig. 1</i>    | 5.9                   | 0.00014                     | 0.87                 | 0.83                  |
| <i>Fig. 2</i>    | 21.7                  | .00041                      | 1.42                 | 0.58                  |
| <i>Fig. 3</i>    | 18                    | 1.1e-5                      | 5.6                  | 0.015                 |
| <i>Fig. 4</i>    | 8.22                  | 0.0009                      | 2.74                 | 0.299                 |
| <i>Fig. 5</i>    | 7.2                   | 9.2e-5                      | na                   | na                    |
| <i>Fig. 6</i>    | 4.7                   | 0.0082                      | 1.59                 | 0.58                  |
| Mean +/- s.e.m.  | <b>10.95 +/- 2.89</b> |                             | <b>2.44 +/- 0.85</b> |                       |
